# Supplementary material for: Palygorskite-Based Organic–Inorganic Hybrid Nanocomposite for Enhanced Antibacterial Activities
Source: MDPI journal article supplement (doi:10.3390/nano11123230), 2021-11-28
Supplement: s1 [file s1]

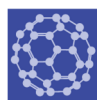

## Supplementary Materials

# Palygorskite-Based Organic–Inorganic Hybrid Nanocomposite for Enhanced Antibacterial Activities

Aiping Hui, Fangfang Yang, Rui Yan, Yuru Kang and Aiqin Wang \*

Key Laboratory of Clay Mineral Applied Research of Gansu Province, Center of Eco-Material and Green Chemistry, Lanzhou Institute of Chemical Physics, Chinese Academy of Sciences, Lanzhou 730000, China; aphui1215@163.com (A.H.); yangff@licp.cas.cn (F.Y.); yanjie4712010@163.com (R.Y.); yurukang@licp.cas.cn (Y.K.)

\* Correspondence: aqwang@licp.cas.cn; Tel.: +86-931-4968-118

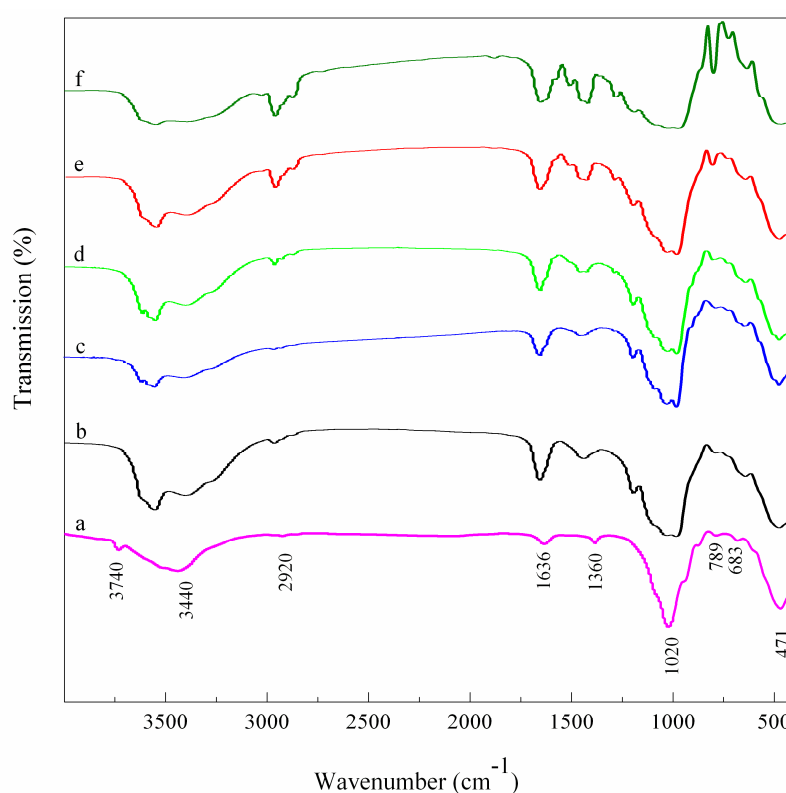

**Figure S1.** FTIR spectra of PAL encompassed by (a) 0%, (b) 1%, (c) 2.5%, (d) 5%, (e) 10%, (f) 20% CAR.

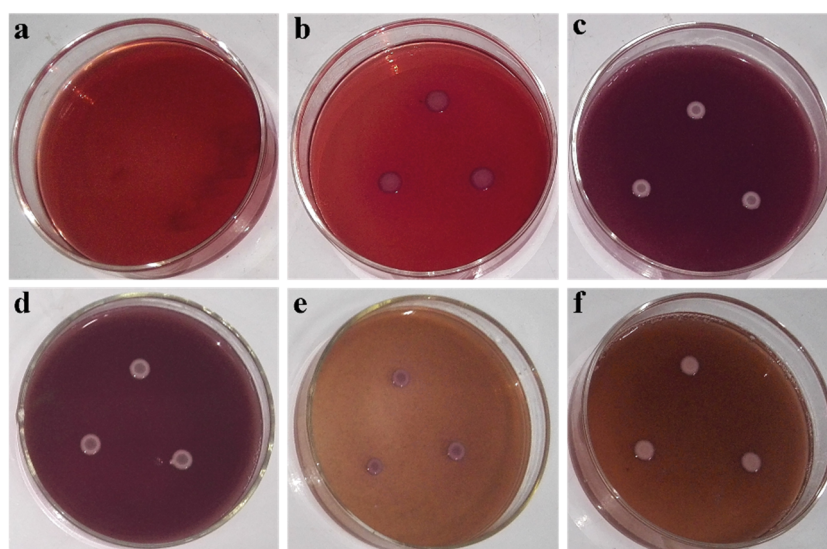

**Figure S2.** (a) Blank control, (b) positive control of *E. coli*, *E. coli* treated by PAL with different concentrations (c) 50 mg/mL, (d) 20 mg/mL, (e) 10 mg/mL, (f) 1 mg/mL.

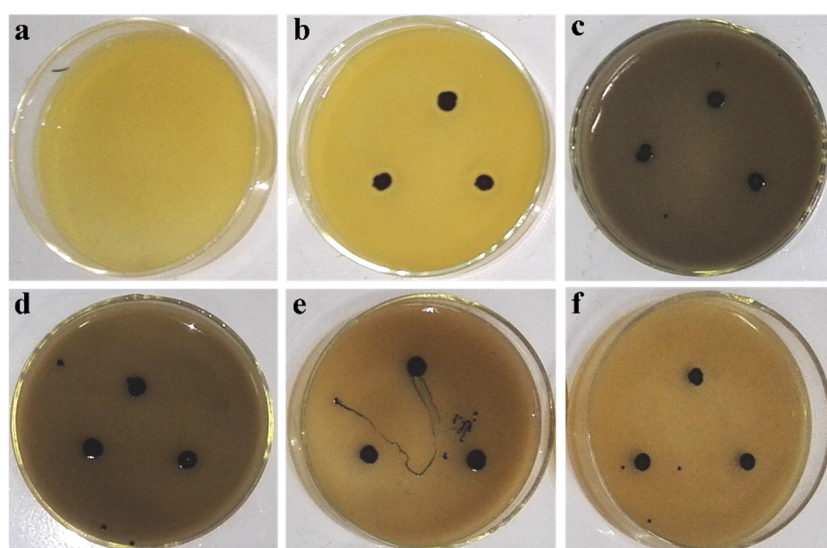

**Figure S3.** (a) Blank control, (b) positive control of *S. aureus*, *S. aureus* treated by PAL with different concentrations (c) 50 mg/mL, (d) 20 mg/mL, (e) 10 mg/mL, (f) 1 mg/mL.

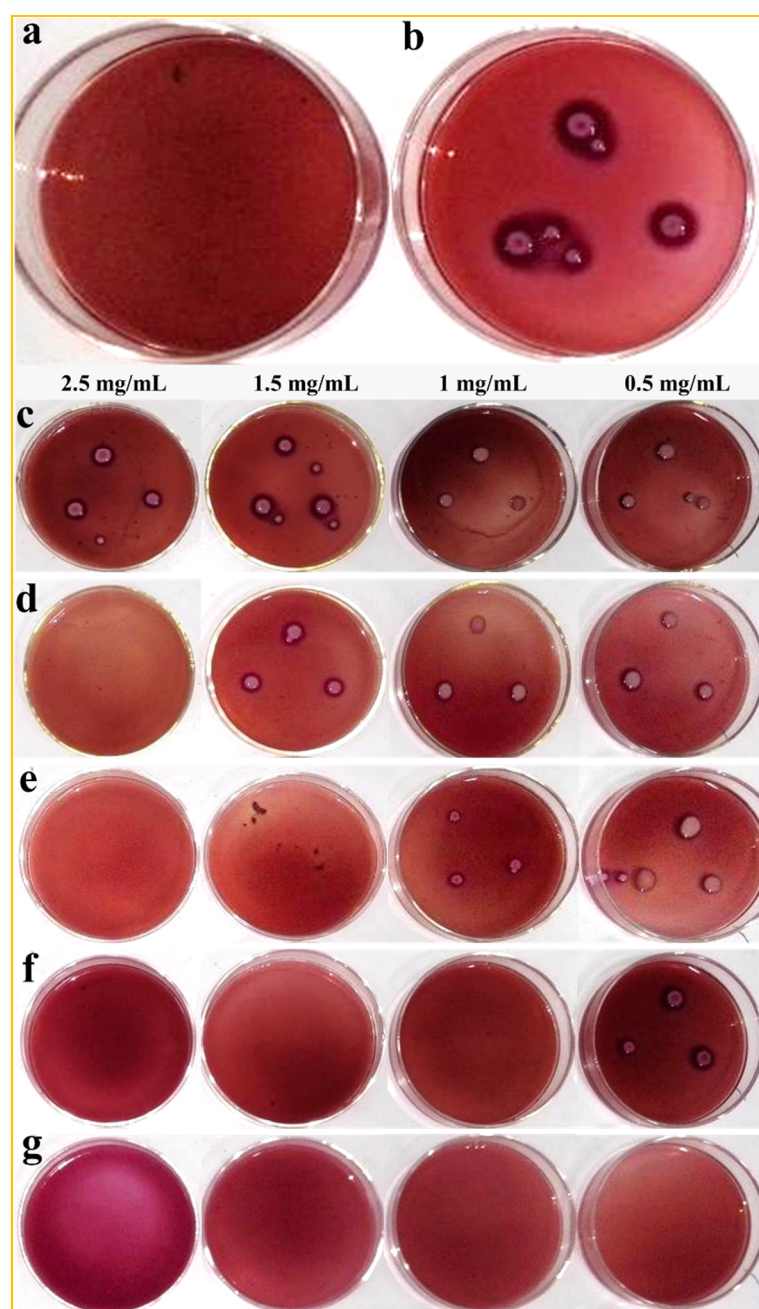

**Figure S4.** (a) Blank control, (b) positive control, MIC evaluation of PAL encompassed by (c) 1%, (d) 2.5%, (e) 5%, (f) 10%, (g) 20% CAR.

**Table S1.** Effects of preparation parameters on antibacterial activities of ZnO/PAL against *E. coli*.

| Factors | Alkali                            | $n_{Zn^{2+}}/n_{alkali}$ | Temperature (°C) | Time (h) | PAL (%) | MIC (mg/mL) |
|---------|-----------------------------------|--------------------------|------------------|----------|---------|-------------|
| S1      | NH <sub>3</sub> ·H <sub>2</sub> O | 1:3                      | 450              | 4        | 20      | 5           |
| S2      | NaOH                              | 1:3                      | 450              | 4        | 20      | 5           |
| S3      | HMTA                              | 1:3                      | 450              | 4        | 20      | 10          |
| S4      | Na <sub>2</sub> CO <sub>3</sub>   | 1:3                      | 450              | 4        | 20      | 10          |
| S5      | NaOH                              | 1:1                      | 450              | 4        | 20      | 10          |
| S6      | NaOH                              | 1:1.5                    | 450              | 4        | 20      | 10          |
| S7      | NaOH                              | 1:2                      | 450              | 4        | 20      | 5           |
| S8      | NaOH                              | 1:2.5                    | 450              | 4        | 20      | 5           |
| S9      | NaOH                              | 1:3                      | 450              | 4        | 20      | 10          |
| S10     | NaOH                              | 1:2                      | 300              | 4        | 20      | 5           |
| S11     | NaOH                              | 1:2                      | 350              | 4        | 20      | 2.5         |
| S12     | NaOH                              | 1:2                      | 400              | 4        | 20      | 2.5         |
| S13     | NaOH                              | 1:2                      | 450              | 4        | 20      | 5           |
| S14     | NaOH                              | 1:2                      | 500              | 4        | 20      | 5           |
| S15     | NaOH                              | 1:2                      | 600              | 4        | 20      | 10          |
| S16     | NaOH                              | 1:2                      | 400              | 1        | 20      | 5           |
| S17     | NaOH                              | 1:2                      | 400              | 2        | 20      | 5           |
| S18     | NaOH                              | 1:2                      | 400              | 3        | 20      | 2.5         |
| Factors | Alkali                            | $n_{Zn^{2+}}/n_{alkali}$ | Temperature (°C) | Time (h) | PAL (%) | MIC (mg/mL) |
| S19     | NaOH                              | 1:2                      | 400              | 4        | 20      | 2.5         |
| S20     | NaOH                              | 1:2                      | 400              | 6        | 20      | 5           |
| S21     | NaOH                              | 1:2                      | 400              | 8        | 20      | 5           |
| S22     | NaOH                              | 1:2                      | 400              | 3        | 10      | 1.5         |
| S23     | NaOH                              | 1:2                      | 400              | 3        | 20      | 1.5         |
| S24     | NaOH                              | 1:2                      | 400              | 3        | 30      | 2.5         |
| S25     | NaOH                              | 1:2                      | 400              | 3        | 40      | 5           |
| S26     | NaOH                              | 1:2                      | 400              | 3        | 50      | 10          |
| S27     | NaOH                              | 1:2                      | 400              | 3        | 60      | 10          |



**Table S2.** The MIC values of PEOs/ZnO/PAL nanocomposites against *E. coli* and *S. aureus*.

| Samples                | MIC (mg/mL)    |                  |
|------------------------|----------------|------------------|
|                        | <i>E. coli</i> | <i>S. aureus</i> |
| Citral/ZnO/PAL         | 1.5            | 5                |
| Thymol/ZnO/PAL         | 1              | 2.5              |
| Carvacrol/ZnO/PAL      | 0.5            | 1.5              |
| Oregano oil/ZnO/PAL    | 0.5            | 2.5              |
| Cinnamaldehyde/ZnO/PAL | 1              | 2.5              |

**Table S3.** The MIC values of PAL and ZnO/PAL encompassed by different concentrations of CAR against *E. coli*.

| wt% | MIC (mg/mL) against <i>E. coli</i> |             |
|-----|------------------------------------|-------------|
|     | CAR/PAL                            | CAR/ZnO/PAL |
| 1   | 5                                  | 1           |
| 2.5 | 5                                  | 1           |
| 5   | 2.5                                | 1           |
| 10  | 2.5                                | 0.5         |
| 20  | 1.5                                | 0.5         |
